# Supplementary material for: The Unique Phylogenetic Position of a Novel Tick-Borne Phlebovirus Ensures an Ixodid Origin of the Genus Phlebovirus
Source: PubMed Central journal article supplement (PMC6001614; doi:10.1128/msphere.00239-18), 2018-06-13

Fig. S3 Matsuno et al.

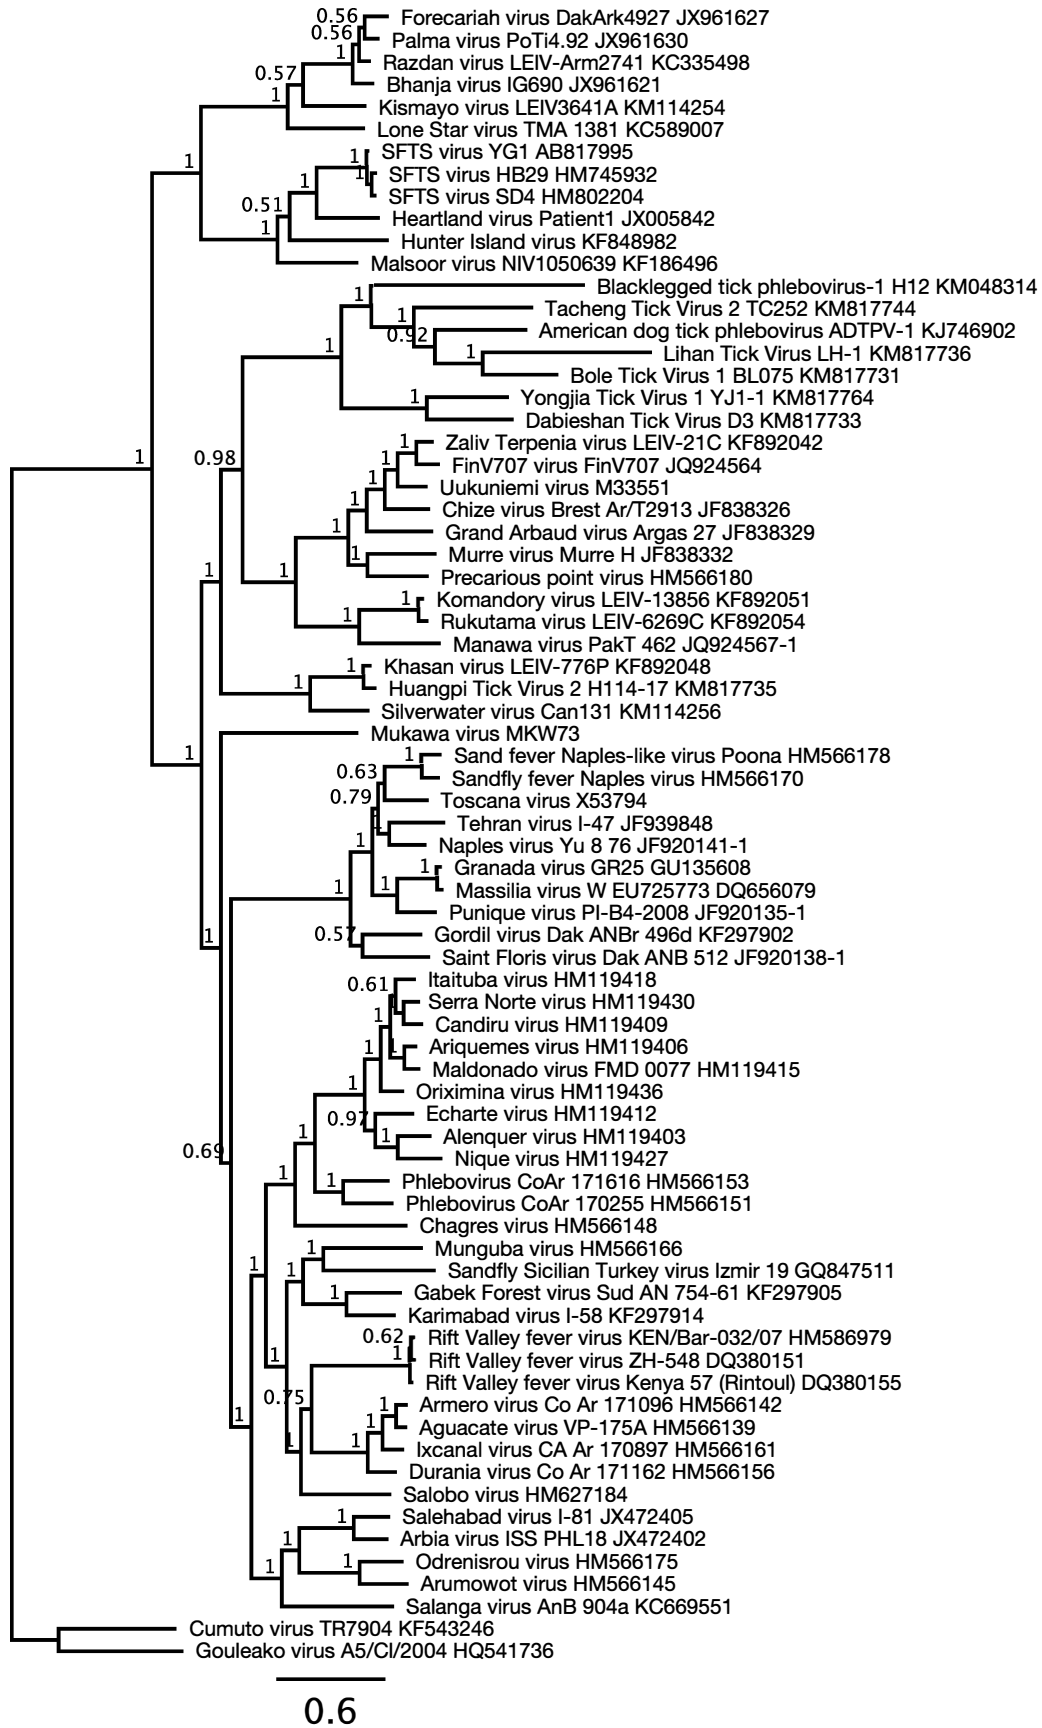

Supplement: sph003182570sf3.pdf [file sph003182570sf3.pdf]
